# Supplementary material for: Cardiopulmonary Resuscitation Competency and Implementation Barriers among Security Guards in Urban China: A Mixed-Methods Study
Source: Research Square preprint supplement (doi:10.21203/rs.3.rs-6641847/v1), 2025-10-29
Supplement: Supplementary file 1 [file e0d7db1fe3f8f621141dded4.docx]

**Table legends**

Table S1. Multiple Linear Regression Analysis of Factors Influencing Knowledge, Attitude, and Behaviour Scores of CPR (N=1001)

Table S2. Model Fit Indices for Latent Profile Analysis

Table S3. Distribution and characteristics of latent CPR behavioral subgroups

Table S4. Univariate Analysis of demographic, knowledge, attitude, self-efficacy, operational skills and Behavioral differences across CPR subgroups

Table S1. Multiple Linear Regression Analysis of Factors Influencing Knowledge, Attitude, and Behaviour Scores of CPR (N=1001)

| Independent Variable | Independent Variable | | Beta (SE) | Standardized Beta | t-value | P-value | | |
| --- | --- | --- | --- | --- | --- | --- | --- | --- |
| a Knowledge, Attitude, and Behaviour Scores | | | | | | |
| Constant | 44.376 | 1.192 | | - | 37.242 | ＜0.001** | |
| Age (60-65 years) | -0.513 | 0.137 | | -0.102 | -3.738 | ＜0.001** | |
| Educational level (Bachelor’s or above) | 0.250 | 0.094 | | 0.063 | 2.668 | 0.008** | |
| Workplace |  |  | |  |  |  | |
| Workplace (Subway) | 0.987 | 0.434 | | 0.055 | 2.273 | 0.023* | |
| Workplace (Supermarket) | -0.673 | 0.320 | | -0.050 | -2.104 | 0.036* | |
| Job Experience (<1 years) | 0.235 | 0.091 | | 0.061 | 2.589 | 0.010** | |
| Training Experience (Yes) | 2.248 | 0.309 | | 0.209 | 7.275 | ＜0.001** | |
| Last Training Time (>3 years or untrained) | -1.610 | 0.112 | | -0.393 | -14.349 | ＜0.001** | |
| CPR Proficiency (No) | -0.849 | 0.341 | | -0.072 | -2.486 | 0.013* | |
| Witnessed Cardiac Arrest (Yes) | 1.540 | 0.484 | | 0.077 | 3.181 | 0.002** | |
| Self-Efficacy Level (low Level) | -1.752 | 0.208 | | 0.221 | 8.410 | ＜0.001** | |

Notes:
a. Knowledge, Attitude, and Behaviour Scores: R² = 0.487, Adjusted R² = 0.481, F = 78.135, P < 0.001.

Table S2. Model Fit Indices for Latent Profile Analysis (N= 1,001)

| **Model** | **Log-Likelihood** | **AIC** | **BIC** | **aBIC** | **Entropy** | **LMRT** | **BLRT** | **Class Probabilities** |
| --- | --- | --- | --- | --- | --- | --- | --- | --- |
| C1 | -8992.539 | 18017.079 | 18095.603 | 18044.786 | － | － | － | 1.000 |
| C2 | -7047.319 | 14144.638 | 14267.332 | 14187.931 | 0.988 | 0.7693 | 0.000 | 0.692/0.308 |
| C3 | -6237.889 | 12543.779 | 12710.642 | 12602.656 | 0.999 | 1.0000 | 0.0000 | 0.687/0.208/0.105 |
| C4 | -5187.350 | 10460.700 | 10671.733 | 10535.163 | 0.999 | 0.0000 | 0.0000 | 0.213/0.685/0.001/0.101 |

Abbreviations: AIC = Akaike Information Criterion; BIC = Bayesian Information Criterion; aBIC = Adjusted BIC; LMRT = Lo-Mendell-Rubin Test; BLRT = Bootstrap Likelihood Ratio Test.

Notes:

1. The 3-class model was selected based on lowest AIC/BIC, high entropy (>0.8), and significant LMRT/BLRT.

2. Dashes (–) indicate values not applicable for single-class models.

Table S3. Distribution and characteristics of latent CPR behaviour subgroups

| **Subgroup** | **Prevalence (%)** | **Sample Size** | **Key Features** |  |  |
| --- | --- | --- | --- | --- | --- |
| Class 1 | 77 | 771 | Low-Behavior Group | | |
| Class 2 | 19.6 | 196 | Moderate-Behavior Group | | |
| Class 3 | 3.4 | 34 | High-performance group | | |

Table S4. Univariate Analysis of demographic, knowledge, attitude, self-efficacy, operational skills and Behavioral differences across CPR subgroups (N=1001)

| **Variable** | **Low-Behavior Group (n=771)** | **Moderate-Behavior Group (n=196)** | | **High-Behavior Group (n=34)** | ***χ²/F/z* Value** | | ***P-*Value** |
| --- | --- | --- | --- | --- | --- | --- | --- |
| Age |  |  |  | |  | |  |
| 18–29 years | 41 (5.32%) | 30 (15.31%) | 7 (20.59%) | | 45.173 | | <0.001 |
| 30–39 years | 185 (23.99%) | 22 (11.22%) | 11 (32.35%) | | |  |  |
| 40–49 years | 217 (28.15%) | 63 (32.14%) | 6 (17.65%) | |  | |  |
| 50–59 years | 278 (36.06%) | 71 (36.22%) | 9 (26.47%) | |  | |  |
| 60–65 years | 50 (6.49%) | 10 (5.10%) | 1 (2.94%) | |  | |  |
| Educational Level | |  |  | | 34.315 | | <0.001 |
| Junior High school or Below | 450 (58.37%) | 94 (47.96%) | 9 (26.47%) | |  | |  |
| High School | 229 (29.70%) | 68 (34.69%) | 11 (32.35%) | |  | |  |
| Junior college | 71 (9.21%) | 24 (12.24%) | 9 (26.47%) | |  | |  |
| Bachelor’s degree or Above | 21 (2.72%) | 10 (5.10%) | 5 (14.71%) | |  | |  |
| Workplace |  |  |  | | 158.94 | | <0.001 |
| Residential living | 170 (22.05%) | 15 (7.65%) | 0 (0.00%) | |  | |  |
| Hospital | 184 (23.87%) | 11 (5.61%) | 0 (0.00%) | |  | |  |
| Airport | 94 (12.19%) | 40 (20.41%) | 4 (11.76%) | |  | |  |
| Supermarket | 141 (18.29%) | 44 (22.45%) | 3 (8.82%) | |  | |  |
| Office Building | 137 (17.77%) | 39 (19.90%) | 22 (64.71%) | |  | |  |
| Subway | 45 (5.84%) | 47 (23.98%) | 5 (14.71%) | |  | |  |
| Training Experience | |  |  | | 42.301 | | <0.001 |
| No | 485 (62.91%) | 82 (41.84%) | 9 (26.47%) | |  | |  |
| Yes | 286 (37.09%) | 114 (58.16%) | 25 (73.53%) | |  | |  |
| Lasting Training time | |  |  | | 575.96 | | <0.001 |
| <6 months | 5 (0.65%) | 31 (15.82%) | 24 (70.59%) | |  | |  |
| 6 months–1 year | 37 (4.80%) | 82 (41.84%) | 10 (29.41%) | |  | |  |
| 1–2 years | 37 (4.80%) | 1 (0.51%) | 0 (0.00%) | |  | |  |
| 2–3 years | 132 (17.12%) | 35 (17.86%) | 0 (0.00%) | |  | |  |
| >3 years or None | 560 (72.63%) | 47 (23.98%) | 0 (0.00%) | |  | |  |
| Training Frequency | |  |  | | 65.535 | | <0.001 |
| 0 times | 475 (61.61%) | 92 (46.94%) | 9 (26.47%) | |  | |  |
| 1 time | 188 (24.38%) | 73 (37.24%) | 10 (29.41%) | |  | |  |
| 2 times | 62 (8.04%) | 25 (12.76%) | 4 (11.76%) | |  | |  |
| ≥3 times | 46 (5.97%) | 6 (3.06%) | 11 (32.35%) | |  | |  |
| Knowledge Score | 4.44 ± 0.80 | 4.78 ± 0.80 | 5.82 ± 0.94 | | 57.282 | | <0.001 |
| Attitude Score | 18.59 ± 2.80 | 19.63 ± 2.45 | 21.06 ± 2.16 | | 22.869 | | <0.001 |
| Self-Efficacy Score | 6.05 ± 2.61 | 7.24 ± 2.56 | 9.79 ± 2.26 | | 29.51 | | <0.001 |
| Operational Skills Score | 1.57 ± 4.42 | 1.75 ± 4.76 | 8.47 ± 8.66 | | 35.307 | | <0.001 |

*Note: P < 0.05, P < 0.01*
